# Supplementary material
Source: HighWire-hosted journal article supplement (https://bmjopengastro.bmj.com/highwire/filestream/2187/field_highwire_adjunct_files/1/bmjgast-2021-000638supp002_data_supplement.pdf)
Supplement: bmjgast-2021-000638supp002_data_supplement.pdf [file bmjgast-2021-000638supp002_data_supplement.pdf]

Supplementary Table 2

|                                                                 | <b>Patients with Abnormal ALT (&gt;1x ULN) (n=152)</b> | <b>Patients with all normal Liver enzymes (n=788)</b> | <b>P-value</b> |
|-----------------------------------------------------------------|--------------------------------------------------------|-------------------------------------------------------|----------------|
| <b>Age</b>                                                      | 56.7 ± 11.9                                            | 59.4 ± 13.6                                           | 0.02           |
| <b>Sex</b>                                                      |                                                        |                                                       | <0.01          |
| M                                                               | 101 (66.5%)                                            | 329 (41.8%)                                           |                |
| F                                                               | 51 (33.6%)                                             | 459 (58.3%)                                           |                |
| <b>BMI</b>                                                      | 30.7 ± 6.2                                             | 28.1 ± 5.6                                            | <0.01          |
| <b>Obesity (BMI≥30)</b>                                         | 73 (48.3%)                                             | 235 (29.9%)                                           | <0.01          |
| <b>Alcohol intake (Within limits: ≤21 units M, ≤14 units F)</b> |                                                        |                                                       | <0.01          |
| Non-drinker                                                     | 23 (15.3%)                                             | 164 (21.4%)                                           |                |
| Within limits                                                   | 98 (65.3%)                                             | 528 (68.8%)                                           |                |
| Above limits                                                    | 29 (19.3%)                                             | 75 (9.8%)                                             |                |
| <b>AUDIT – C</b>                                                |                                                        |                                                       | <0.01          |
| Low risk                                                        | 61 (40.4%)                                             | 480 (61.3%)                                           |                |
| High risk                                                       | 90 (59.6%)                                             | 302 (38.6%)                                           |                |
| <b>Hypertension</b>                                             | 58 (38.2%)                                             | 254 (32.3%)                                           | 0.16           |
| <b>Type II Diabetes</b>                                         | 24 (15.8%)                                             | 93 (11.8%)                                            | 0.17           |
| <b>Metabolic syndrome (Harmonised criteria)</b>                 | 81 (55.5%)                                             | 312 (40.3%)                                           | <0.01          |
| <b>Triglyceride</b>                                             | 1.8 ± 1.3                                              | 1.2 ± 0.7                                             | <0.01          |
| <b>HDL-cholesterol</b>                                          | 1.3 ± 0.4                                              | 1.5 ± 0.5                                             | <0.01          |
| <b>FLI</b>                                                      | 74.4 ± 27.5                                            | 47.3 ± 30.2                                           | <0.01          |
| <b>FLI group</b>                                                |                                                        |                                                       | <0.01          |
| Low                                                             | 18 (12.7%)                                             | 283 (36.6%)                                           |                |
| Intermediate                                                    | 16 (11.3%)                                             | 208 (26.9%)                                           |                |

|                                 |             |              |       |
|---------------------------------|-------------|--------------|-------|
| High                            | 108 (76.1%) | 283 (36.6%)  |       |
| <b>FIB-4 score</b>              | 1.54 ± 1.04 | 1.27 ± 0.64  | <0.01 |
| <b>Age-adjusted FIB-4 score</b> |             |              | <0.01 |
| Low                             | 74 (52.5%)  | 618 (79.1%)  |       |
| Intermediate                    | 57 (40.4%)  | 139 (17.8%)  |       |
| High                            | 10 (7.1%)   | 24 (3.1%)    |       |
| <b>QRisk2</b>                   | 15.8 ± 14.0 | 15.70 ± 12.8 | 0.95  |

Supplementary Table 1: Comparison of patient demographics between patients with abnormal ALT and patients with all normal liver enzymes
